# Supplementary material for: Free energy profiles for unwrapping the outer superhelical turn of nucleosomal DNA
Source: PLoS Comput Biol. 2018 Mar 5;14(3):e1006024. doi: 10.1371/journal.pcbi.1006024 (PMC5854429; doi:10.1371/journal.pcbi.1006024)
Supplement: S3 Table — DNA conformations in the umbrella sampling (15 ns) were analyzed using X3DNA21. (XLSX) [file pcbi.1006024.s008.xlsx]

## Sheet: GC
walker	di (A)	Shear	std.	Stretch	std.	Stagger	std.	Buckle	std.	Prop-Tw	std.	Opening	std.	Shift	std.	Slide	std.	Rise	std.	Tilt	std.	Roll	std.	Twist	std.
1	40	-0.16	0.35	-0.05	0.16	-0.16	0.39	-5.42	10.55	-11.37	8.73	0.36	4.75	0.4	0.61	-0.96	0.67	3.44	0.34	0.73	4.74	12.19	6.57	28.75	4.59
2	42	-0.15	0.32	-0.05	0.11	-0.16	0.38	-6.66	10.31	-12.33	8.75	0.24	3.68	0.46	0.55	-1.07	0.63	3.45	0.33	0.7	4.7	13.66	6.29	28.11	4.2
3	44	-0.16	0.33	-0.05	0.13	-0.21	0.38	-6.53	10.13	-11.51	8.91	0.34	4.14	0.48	0.56	-1.03	0.61	3.44	0.32	0.51	4.68	15.68	6.68	27.34	4.51
4	46	-0.15	0.31	-0.05	0.11	-0.18	0.37	-6.75	9.85	-11.72	8.81	0.45	3.62	0.42	0.56	-1.11	0.59	3.44	0.32	0.48	4.9	15.76	6.62	27.1	4.27
5	48	-0.14	0.31	-0.05	0.11	-0.17	0.4	-5.66	11.55	-12.35	8.92	0.29	3.54	0.38	0.61	-0.9	0.68	3.46	0.36	1.04	5	12.44	6.21	28.64	4.93
6	50	-0.15	0.31	-0.06	0.11	-0.17	0.38	-7.51	10.35	-13.36	8.6	0.17	3.64	0.38	0.56	-1.02	0.59	3.46	0.33	0.79	4.74	13.94	6.2	28.81	4.27
7	52	-0.16	0.32	-0.06	0.14	-0.13	0.38	-5.42	10.28	-12.48	8.44	0.22	4.09	0.5	0.55	-0.95	0.66	3.43	0.33	0.98	4.87	12.27	6.49	29.15	4.41
8	54	-0.15	0.33	-0.05	0.13	-0.17	0.38	-6.11	9.89	-11.51	8.61	0.38	4.11	0.4	0.58	-1.11	0.6	3.42	0.32	0.59	4.73	14.88	6.53	27.34	4.58
9	56	-0.16	0.31	-0.06	0.11	-0.13	0.37	-5.03	9.87	-11.34	8.59	0.3	3.46	0.46	0.53	-1.05	0.62	3.42	0.33	0.58	4.77	13.65	6.53	27.8	4.16
10	58	-0.13	0.31	-0.06	0.11	-0.08	0.39	-2.88	10.15	-10.38	8.75	-0.31	3.43	0.49	0.64	-0.86	0.73	3.39	0.35	0.67	4.68	8.84	6.14	28.81	5.03
11	60	-0.17	0.35	-0.05	0.14	-0.13	0.38	-5.93	10.2	-12.49	8.72	0.42	4.38	0.42	0.6	-1	0.65	3.42	0.33	0.82	4.81	13.57	6.53	28.36	4.54
12	62	-0.16	0.32	-0.06	0.11	-0.14	0.38	-5.1	10.1	-11.79	8.6	0.32	3.72	0.34	0.58	-1.05	0.61	3.41	0.33	0.24	4.74	13.79	6.26	28.33	4.18
13	64	-0.15	0.31	-0.06	0.11	-0.11	0.39	-3.98	10.75	-11.35	8.42	-0.03	3.42	0.44	0.62	-0.97	0.68	3.41	0.34	0.87	4.84	11.11	6.39	29.12	4.3
14	66	-0.15	0.3	-0.06	0.11	-0.13	0.38	-5.11	10.21	-10.76	8.35	0.01	3.42	0.47	0.54	-1.06	0.68	3.42	0.35	0.82	4.68	10.65	6.07	29.22	4.17
15	68	-0.14	0.3	-0.06	0.11	-0.14	0.38	-4.49	10.45	-11.48	8.59	0.09	3.45	0.39	0.6	-0.95	0.68	3.41	0.34	0.41	4.75	11.76	6.15	29.24	4.35
16	70	-0.14	0.31	-0.06	0.11	-0.12	0.38	-4.97	9.96	-11.23	8.38	0.02	3.49	0.4	0.59	-1.03	0.66	3.4	0.33	0.4	4.62	11.18	5.84	29.3	4.19
17	72	-0.14	0.32	-0.06	0.11	-0.12	0.39	-4.17	10.6	-10.15	8.32	-0.13	3.66	0.38	0.62	-0.99	0.68	3.41	0.36	0.76	4.75	8.79	5.87	30.04	4.49
18	74	-0.15	0.31	-0.06	0.12	-0.13	0.39	-4.85	10.23	-9.96	8.44	0.11	3.52	0.37	0.56	-1.13	0.66	3.41	0.36	0.88	4.81	9.7	6.2	28.65	4.29
19	76	-0.15	0.31	-0.06	0.11	-0.12	0.38	-4.6	10.45	-12.28	8.54	0.17	3.55	0.39	0.6	-0.94	0.66	3.41	0.33	0.75	4.75	12.06	6.02	29.23	4.77
20	78	-0.13	0.31	-0.05	0.11	-0.11	0.39	-2.53	10.69	-9.22	8.71	0.04	3.37	0.26	0.63	-0.92	0.73	3.37	0.37	0.34	4.69	8.14	5.98	29.18	4.92
21	80	-0.15	0.31	-0.06	0.11	-0.09	0.39	-2.83	10.39	-10.13	8.5	-0.02	3.37	0.31	0.59	-0.94	0.74	3.39	0.37	0.31	4.68	8.25	5.56	29.8	4.46
22	82	-0.12	0.3	-0.05	0.11	-0.04	0.39	-1.52	10.2	-9.08	9.32	-0.41	3.37	0.44	0.68	-0.77	0.74	3.34	0.36	0.08	4.79	7.48	6.24	27.74	5.83
23	84	-0.14	0.31	-0.05	0.11	-0.15	0.38	-4.92	10.25	-10.25	8.68	0.26	3.5	0.43	0.59	-1.09	0.66	3.41	0.34	0.84	4.83	12.74	6.65	27.51	4.65
24	86	-0.14	0.32	-0.06	0.11	-0.09	0.39	-2.15	10.75	-9.73	8.66	-0.06	3.68	0.25	0.7	-0.76	0.78	3.37	0.38	0.29	4.69	7.77	5.77	29.79	5.26
25	88	-0.13	0.3	-0.05	0.11	-0.07	0.4	-1.59	11.05	-9.6	8.61	0.01	3.4	0.24	0.68	-0.8	0.78	3.36	0.36	-0.22	4.72	7.7	5.73	29.73	5.19
26	90	-0.14	0.31	-0.06	0.11	-0.1	0.39	-2.87	10.62	-9.55	8.58	-0.09	3.46	0.27	0.61	-0.93	0.73	3.37	0.38	0.63	4.67	7.9	5.65	29.51	4.83
27	92	-0.13	0.31	-0.06	0.11	-0.06	0.4	-0.37	11	-8.19	8.83	-0.18	3.4	0.15	0.68	-0.8	0.77	3.35	0.4	0.43	4.67	5.04	6.01	29.94	5.63
28	94	-0.11	0.31	-0.06	0.11	-0.04	0.38	-2.21	10.54	-11.32	7.9	-0.48	3.36	0.25	0.65	-0.68	0.73	3.34	0.33	0.28	4.54	8.38	5.45	31.52	5.12
29	96	-0.14	0.3	-0.06	0.11	-0.11	0.38	-4.65	10.29	-11.15	8.23	-0.13	3.37	0.38	0.61	-0.94	0.71	3.41	0.34	0.6	4.72	9.41	5.88	30.33	4.4
30	98	-0.14	0.3	-0.06	0.11	-0.12	0.38	-3.79	10.4	-10.46	8.5	-0.04	3.4	0.39	0.61	-0.96	0.69	3.4	0.35	0.58	4.66	10.18	5.91	29.36	4.58
31	100	-0.14	0.31	-0.06	0.11	-0.08	0.4	-2.76	10.28	-9.78	8.93	-0.25	3.25	0.48	0.65	-0.98	0.72	3.38	0.37	0.96	4.99	8.53	6.55	27.48	5.57
32	102	-0.13	0.31	-0.05	0.11	-0.08	0.39	-0.98	10.74	-8.63	8.64	-0.12	3.54	0.18	0.7	-0.72	0.78	3.34	0.37	0	4.65	7.12	5.84	29.95	5.69
33	104	-0.14	0.31	-0.06	0.11	-0.1	0.39	-2.69	10.67	-9.64	8.69	0.03	3.45	0.29	0.62	-0.87	0.76	3.38	0.37	0.09	4.7	8.4	5.79	29.56	4.74
34	106	-0.13	0.31	-0.06	0.11	-0.09	0.39	-1.48	10.85	-7.72	8.75	-0.16	3.25	0.18	0.63	-0.92	0.8	3.37	0.4	0.44	4.64	5.22	5.66	29.78	4.75
35	108	-0.12	0.31	-0.06	0.11	-0.03	0.39	0.94	10.57	-9.79	8.51	-0.18	3.35	0.12	0.69	-0.44	0.83	3.32	0.36	-0.87	4.66	6.39	5.37	31.44	5.59
36	110	-0.15	0.31	-0.06	0.11	-0.12	0.39	-3.46	10.66	-9.66	8.44	0.03	3.38	0.36	0.57	-1.06	0.71	3.41	0.38	0.91	4.76	8.49	6.04	29.07	4.43
37	112	-0.14	0.31	-0.06	0.11	-0.11	0.38	-3.74	10.31	-9.28	8.66	-0.01	3.37	0.24	0.59	-1.03	0.71	3.39	0.37	0.7	4.68	7.46	5.68	29.32	4.43
38	114	-0.12	0.3	-0.06	0.11	-0.07	0.39	-0.25	11.11	-9.13	8.8	-0.1	3.3	0.14	0.74	-0.69	0.76	3.35	0.39	0.23	4.72	6.41	5.81	30.02	5.49
39	116	-0.14	0.32	-0.06	0.11	-0.09	0.4	-2.23	11.13	-8.9	8.85	-0.12	3.5	0.25	0.67	-0.9	0.76	3.4	0.39	0.83	4.82	6.39	5.99	29.95	5.21
40	118	-0.13	0.31	-0.05	0.11	-0.03	0.4	4.37	12.35	-8.3	9.3	0.26	3.4	-0.04	0.75	-0.48	0.76	3.28	0.42	-0.35	4.67	5.79	5.83	28.91	8.43
41	120	-0.14	0.32	-0.06	0.12	-0.09	0.39	-2.59	10.44	-9.2	8.76	-0.01	3.7	0.34	0.62	-0.89	0.73	3.37	0.37	0.51	4.76	7.53	5.72	29.63	4.76
42	122	-0.12	0.31	-0.06	0.11	-0.06	0.39	-1.29	10.92	-8.79	8.69	-0.17	3.42	0.14	0.67	-0.81	0.75	3.34	0.38	0.16	4.66	5.85	5.52	29.94	4.99
43	124	-0.13	0.31	-0.06	0.11	-0.06	0.39	-0.26	11.26	-8.88	9.02	-0.08	3.34	0.18	0.7	-0.73	0.78	3.35	0.4	0.51	4.71	5.5	5.57	30.22	5.52
44	126	-0.12	0.32	-0.05	0.12	-0.03	0.4	3.14	11.12	-7.9	9.03	-0.07	3.55	0	0.73	-0.51	0.78	3.3	0.41	-0.12	4.61	4.37	5.96	30.16	7.05
45	128	-0.13	0.3	-0.06	0.11	-0.1	0.4	-1.53	11.19	-8.19	8.64	-0.23	3.21	0.17	0.66	-0.82	0.75	3.37	0.4	0.76	4.77	5.61	5.76	30.08	5.12
46	130	-0.12	0.31	-0.06	0.11	-0.05	0.4	0.82	11.41	-8.27	8.86	-0.26	3.27	0.14	0.73	-0.63	0.8	3.35	0.4	0.37	4.72	4.4	5.76	30.54	5.98
47	132	-0.12	0.31	-0.06	0.11	-0.04	0.4	2.5	11.32	-7.5	9.34	-0.14	3.29	-0.02	0.73	-0.47	0.77	3.32	0.44	0.26	4.74	2.32	5.79	30.78	6.56
48	134	-0.1	0.3	-0.05	0.11	-0.03	0.41	2.91	11.29	-6.8	10.37	-0.37	3.33	0.08	0.85	-0.32	0.81	3.33	0.41	0.15	4.87	1.89	6.17	31.31	6.39
49	136	-0.1	0.31	-0.06	0.11	-0.04	0.41	2.08	11.69	-6.93	9.52	-0.31	3.27	0.06	0.77	-0.48	0.77	3.33	0.41	0.2	4.84	2.2	5.96	31.02	6.32
50	138	-0.12	0.31	-0.06	0.11	-0.06	0.4	1.05	11.15	-7.15	9.29	-0.34	3.25	0.06	0.73	-0.64	0.8	3.35	0.41	0.61	4.77	2.95	5.87	30.64	5.49
51	140	-0.11	0.31	-0.06	0.11	-0.08	0.39	-0.34	10.99	-9.92	8.3	-0.15	3.35	0.11	0.72	-0.54	0.75	3.35	0.37	-0.24	4.63	7.05	5.42	31.35	5.36
52	142	-0.12	0.3	-0.06	0.11	-0.04	0.4	1.46	11.23	-8.3	8.82	-0.15	3.24	0.01	0.73	-0.58	0.8	3.34	0.41	0.08	4.73	3.46	5.7	31.22	5.85
53	144	-0.11	0.3	-0.05	0.11	-0.03	0.4	1.2	11.52	-7.47	9.19	-0.31	3.27	0.03	0.69	-0.62	0.79	3.34	0.43	0.24	4.61	2.52	5.87	30.56	6.56
54	146	-0.11	0.31	-0.05	0.11	-0.03	0.4	1.41	11.31	-7.67	9.21	-0.25	3.29	0.06	0.76	-0.43	0.86	3.32	0.42	0.18	4.8	2.71	6.23	31.54	6.13
55	148	-0.11	0.31	-0.05	0.11	-0.05	0.4	2.48	11.53	-7.41	9.5	-0.18	3.29	0.03	0.73	-0.57	0.79	3.33	0.45	0.73	4.9	2.92	6.41	30.05	7.35
56	150	-0.11	0.31	-0.06	0.11	-0.12	0.42	-0.96	11.36	-7.49	9	-0.28	3.33	0.11	0.7	-0.75	0.77	3.37	0.41	0.76	4.87	4.4	5.85	30.4	5.29
57	152	-0.12	0.31	-0.06	0.11	-0.07	0.4	0.19	11.17	-7.35	8.98	-0.33	3.2	0.16	0.64	-0.71	0.77	3.35	0.41	0.96	4.65	3.57	5.7	30.26	5.77
58	154	-0.13	0.31	-0.06	0.11	-0.07	0.41	0.44	11.46	-7.17	9.54	-0.33	3.29	0.11	0.68	-0.75	0.8	3.38	0.44	0.89	4.75	2.59	5.73	30.2	5.67
59	156	-0.13	0.31	-0.06	0.11	-0.08	0.42	1.03	11.62	-5.57	10.26	-0.42	3.25	0.06	0.71	-0.72	0.84	3.4	0.46	1.03	4.85	-0.53	6.43	30.3	5.96
60	158	-0.12	0.32	-0.05	0.11	0.03	0.43	5.43	12.13	-9.67	9.69	0.19	3.31	-0.06	0.86	-0.2	0.81	3.33	0.46	-0.08	4.87	2.09	6.04	31.97	7.27
61	160	-0.11	0.31	-0.05	0.11	-0.03	0.4	2.42	11.13	-7.52	9.46	-0.18	3.3	0.04	0.76	-0.53	0.79	3.31	0.42	0.29	4.75	2.96	6.86	30.37	6.47
62	162	-0.12	0.31	-0.06	0.11	-0.03	0.41	3.11	11.53	-6.58	9.95	-0.16	3.36	-0.09	0.74	-0.48	0.76	3.33	0.44	0.23	4.82	1.37	5.97	30.32	7.22
63	164	-0.12	0.31	-0.06	0.11	-0.06	0.42	1.84	11.57	-5.36	9.64	-0.44	3.25	0.07	0.76	-0.6	0.78	3.36	0.46	1.1	4.97	0.37	6.57	30.4	6.66
64	166	-0.12	0.32	-0.06	0.11	-0.04	0.41	1.6	11.63	-7.3	9.87	-0.29	3.56	0	0.76	-0.57	0.81	3.36	0.44	0.5	4.83	0.76	5.93	31.2	6.02
65	168	-0.11	0.3	-0.05	0.11	-0.01	0.4	5.63	11.3	-6.48	9.67	-0.23	3.31	-0.17	0.79	-0.32	0.71	3.25	0.44	0.1	4.91	1.53	5.83	30.4	8.04
66	170	-0.14	0.31	-0.06	0.11	-0.07	0.39	-2.44	10.62	-10.05	8.78	0.01	3.43	0.2	0.64	-0.88	0.74	3.36	0.37	0.11	4.66	8.09	5.83	29.43	5.31
67	172	-0.14	0.31	-0.06	0.11	-0.09	0.42	-0.39	11.65	-5.79	9.6	-0.4	3.26	-0.02	0.69	-0.76	0.86	3.4	0.44	1.12	5.16	-0.31	6.22	30.94	5.67
68	174	-0.12	0.31	-0.06	0.11	-0.09	0.42	0.06	11.63	-6.17	10.06	-0.5	3.28	0.11	0.72	-0.66	0.81	3.4	0.44	0.97	4.88	0.58	6.9	30.94	6.12
69	176	-0.1	0.31	-0.06	0.11	-0.1	0.41	0.76	11.66	-7.7	8.87	-0.27	3.33	0.18	0.71	-0.59	0.8	3.36	0.41	0.78	4.79	4.63	6.04	30.69	5.59
70	178	-0.12	0.31	-0.06	0.11	-0.08	0.41	1.12	11.52	-6.63	9.72	-0.28	3.45	0.07	0.75	-0.64	0.84	3.38	0.43	0.53	4.88	1.77	6.18	30.84	6.06
71	180	-0.21	0.36	-0.05	0.22	-0.15	0.55	-0.98	14.76	0.29	12	0.38	5.4	-0.49	2.33	0.79	2.36	6.58	3.4	-1.51	7.76	-44.25	53.48	27.1	19.49
average		-0.13	0.31	-0.06	0.12	-0.09	0.4	-1.56	11.39	-9.1	9.26	-0.07	3.52	0.21	0.74	-0.76	0.84	3.42	0.67	0.46	4.84	6.34	11.45	29.69	6.01
