# Supplementary material for: Free energy profiles for unwrapping the outer superhelical turn of nucleosomal DNA
Source: PLoS Comput Biol. 2018 Mar 5;14(3):e1006024. doi: 10.1371/journal.pcbi.1006024 (PMC5854429; doi:10.1371/journal.pcbi.1006024)
Supplement: S8 Table — DNA conformations in the umbrella sampling (15 ns) were analyzed using X3DNA21. (XLSX) [file pcbi.1006024.s013.xlsx]

## Sheet: TA
walker	di (A)	Shear	std.	Stretch	std.	Stagger	std.	Buckle	std.	Prop-Tw	std.	Opening	std.	Shift	std.	Slide	std.	Rise	std.	Tilt	std.	Roll	std.	Twist	std.
0	125	-0.07	0.29	0.02	0.13	0.05	0.44	0.27	11.49	-12.77	8.42	1.64	6.05	0.03	0.69	-0.96	0.55	3.33	0.33	1.16	4.17	1.82	5.23	30.78	4.15
1	127	-0.08	0.29	0.02	0.13	0.09	0.44	-0.83	11.07	-12.05	8.47	1.05	5.98	-0.03	0.68	-0.97	0.55	3.34	0.33	0.63	4.34	1.29	5.27	29.71	4.46
2	129	-0.07	0.29	0.01	0.13	0.07	0.43	-0.28	11.36	-12.7	8.33	0.99	5.96	-0.01	0.69	-0.93	0.56	3.37	0.34	0.91	4.27	1.49	5.45	31.17	4.18
3	131	-0.06	0.29	0.02	0.13	0.04	0.44	-0.76	11.42	-12.57	8.67	1.2	6.18	0.02	0.72	-0.94	0.55	3.34	0.33	1.06	4.31	2.39	5.78	30.41	4.38
4	133	-0.07	0.29	0.02	0.14	0.05	0.44	-1.43	11.11	-12.65	8.47	0.8	6.34	0	0.74	-0.89	0.56	3.34	0.32	1.12	4.33	1.94	6.03	30.64	4.77
5	135	-0.07	0.29	0.02	0.14	0.08	0.44	-1.39	11.3	-12.94	8.32	0.93	6.32	0.04	0.72	-0.9	0.54	3.35	0.32	0.9	4.26	1.76	5.43	31.04	4.47
6	137	-0.06	0.29	0.02	0.13	0.08	0.44	-2	11.09	-12.39	8.39	1.26	5.93	0.05	0.71	-1.01	0.57	3.38	0.35	0.98	4.26	1.63	5.27	30.68	4.38
7	139	-0.09	0.29	0.02	0.13	0.05	0.43	-1.74	11.47	-14.25	8.84	1.21	6.25	0.01	0.72	-0.83	0.53	3.33	0.32	1.03	4.25	2.02	5.34	31.54	4.49
8	141	-0.06	0.29	0.02	0.13	0.01	0.43	-0.25	11.41	-12.07	8.58	1.05	6.08	0	0.73	-1	0.57	3.32	0.33	1.13	4.23	2.56	5.49	30.21	4.48
9	143	-0.08	0.29	0.03	0.19	0.07	0.44	-1.84	11.48	-13.37	8.9	1.26	6.88	0.03	0.73	-0.93	0.56	3.36	0.33	1.07	4.2	1.81	5.6	31.09	4.52
10	145	-0.07	0.29	0.02	0.17	0.04	0.44	-2.11	11.43	-13.1	8.69	1.45	6.62	0.09	0.76	-0.96	0.55	3.37	0.33	1.38	4.28	2.17	5.49	31.13	4.45
11	147	-0.06	0.29	0.02	0.15	0.11	0.45	-2.21	11.44	-13.86	9.37	1.86	6.78	0.21	0.78	-0.89	0.57	3.37	0.33	1.15	4.32	1.53	5.91	31.22	5.04
12	149	-0.08	0.29	0.02	0.13	0.07	0.43	-0.75	12.03	-12.27	8.77	1.02	5.98	0.07	0.69	-0.79	0.63	3.33	0.33	1.01	4.36	1.79	5.69	30.57	5.02
13	151	-0.09	0.29	0.02	0.13	0.04	0.43	-1.62	11.07	-12.24	8.81	1.18	6.14	-0.07	0.78	-0.93	0.54	3.35	0.32	1.18	4.2	1.38	5.53	30.31	5.14
14	153	-0.09	0.29	0.02	0.13	0.08	0.44	-1.88	11.93	-13.82	8.57	0.83	6.27	0.03	0.75	-0.79	0.58	3.37	0.32	1.16	4.24	1.17	5.93	31.93	4.89
15	155	-0.07	0.29	0.02	0.13	0.08	0.43	-0.99	11.52	-12.16	8.26	0.8	5.94	0.04	0.71	-0.87	0.56	3.34	0.32	0.88	4.27	1.29	5.28	30.82	4.5
16	157	-0.08	0.29	0.02	0.14	0.06	0.44	-2.66	11.54	-13.31	9.23	1.32	6.52	-0.01	0.74	-0.93	0.55	3.36	0.33	1.28	4.27	1.98	5.68	31.07	4.45
17	159	-0.06	0.29	0.02	0.13	0.05	0.43	-0.75	11.56	-11.86	8.47	1.31	6.14	0.05	0.73	-1	0.57	3.34	0.33	0.98	4.26	1.68	5.43	30.54	4.46
18	161	-0.08	0.29	0.02	0.13	0.06	0.44	-2.1	11.93	-12.53	8.67	1.04	6.26	0.05	0.75	-0.93	0.55	3.36	0.32	1.24	4.3	1.26	5.76	31.4	4.58
19	163	-0.08	0.29	0.02	0.13	0.06	0.44	-2.18	11.41	-12.67	8.61	0.98	6.17	0	0.75	-1	0.57	3.38	0.33	1.19	4.29	1.63	5.46	30.73	4.74
20	165	-0.09	0.29	0.02	0.16	0.06	0.45	-2.11	11.69	-12.51	8.72	1.18	6.67	0.02	0.75	-0.97	0.55	3.38	0.33	1.09	4.23	1.37	5.52	31.16	4.52
21	167	-0.1	0.29	0.02	0.13	0.04	0.43	-1.69	11.69	-11.98	8.63	0.55	5.92	0.01	0.72	-0.8	0.58	3.35	0.33	1.26	4.34	0.73	6.14	31.53	5.34
22	169	-0.1	0.29	0.02	0.13	0.03	0.44	-1.57	11.59	-11.72	8.54	0.54	5.9	-0.06	0.71	-0.97	0.57	3.36	0.33	1.08	4.22	0.85	5.69	30.67	4.65
23	171	-0.11	0.29	0.02	0.13	0.03	0.45	-3.84	11.45	-12.75	9.86	0.74	6.03	0.05	0.76	-0.81	0.62	3.42	0.35	0.97	4.35	-0.75	7.4	31.94	5.32
24	173	-0.11	0.29	0.02	0.13	0.04	0.44	-2.45	11.95	-12.4	9.11	0.69	5.88	0.08	0.72	-0.77	0.59	3.37	0.33	0.98	4.31	-0.49	7.08	31.83	5.25
25	175	-0.08	0.29	0.02	0.13	0.05	0.44	-1.83	11.71	-11.92	8.49	1.04	6.05	0.06	0.73	-0.92	0.58	3.36	0.33	1.08	4.31	1.09	5.78	30.98	4.68
average		-0.08	0.29	0.02	0.14	0.06	0.44	-1.58	11.54	-12.65	8.73	1.07	6.22	0.03	0.73	-0.91	0.57	3.36	0.33	1.07	4.28	1.44	5.79	30.96	4.71
